# Supplementary material for: Conditional quorum-sensing induction of a cyanide-insensitive terminal oxidase stabilizes cooperating populations of Pseudomonas aeruginosa
Source: PubMed Central journal article supplement (PMC6825135; doi:10.1038/s41467-019-13013-8), 2019-11-01
Supplement: 41467_2019_13013_MOESM1_ESM.pdf [file 41467_2019_13013_MOESM1_ESM.pdf]

Supplementary information for

**Conditional quorum-sensing induction of a cyanide-insensitive terminal oxidase stabilizes cooperating populations of *Pseudomonas aeruginosa***

Yan et al. (2019)

**Supplementary Table 1.** Bacterial strains and plasmids used in this study.

| Strains or plasmids                          | Genotype and/or relevant characteristics                                                                                                                                 | Reference or source |
|----------------------------------------------|--------------------------------------------------------------------------------------------------------------------------------------------------------------------------|---------------------|
| <i>P. aeruginosa</i>                         |                                                                                                                                                                          |                     |
| PAO1-UW                                      | Wild-type                                                                                                                                                                | 1                   |
| PAO1 $\Delta lasR$                           | <i>lasR</i> null mutant                                                                                                                                                  | 2                   |
| PAO1 $\Delta rhlR$                           | <i>rhlR</i> null mutant                                                                                                                                                  | 2                   |
| PAO1 $\Delta lasRrhlR$                       | <i>lasR rhlR</i> null double mutant                                                                                                                                      | 2                   |
| PAO1 $\Delta hcnC$                           | <i>hcnC</i> null mutant                                                                                                                                                  | 2                   |
| PAO1 $\Delta cioA$                           | <i>cioA</i> null mutant                                                                                                                                                  | This study          |
| PAO1 $\Delta rhdA$                           | <i>rhdA</i> null mutant                                                                                                                                                  | This study          |
| PAO1 $\Delta PA4133$                         | PA4133 null mutant                                                                                                                                                       | This study          |
| PAO1 ara-hcn1                                | Wild-type UW strain with L-arabinose-inducible <i>hcnABC</i> inserted at the <i>att</i> site                                                                             | This study          |
| PAO1 $\Delta lasR$ ara-hcn1                  | <i>lasR</i> null mutant with L-arabinose-inducible <i>hcnABC</i> inserted at the <i>att</i> site                                                                         | This study          |
| <i>E. coli</i>                               |                                                                                                                                                                          |                     |
| S17.1 ( $\lambda pir+$ )                     | Conjugal transfer strain for pEXG2 plasmids                                                                                                                              |                     |
| DH5 $\alpha$                                 | Host strain for pUC18T plasmid recombination                                                                                                                             |                     |
| Plasmids                                     |                                                                                                                                                                          |                     |
| pEXG2                                        | Gm <sup>r</sup> <i>mob</i> , <i>sacB</i> , <i>lacZ<math>\alpha</math></i>                                                                                                | 3                   |
| pEXG2- $\Delta cioA$                         | pEXG2 derivative carrying the <i>cioA</i> flanking regions                                                                                                               | This study          |
| pEXG2- $\Delta rhdA$                         | pEXG2 derivative carrying the <i>rhdA</i> flanking regions                                                                                                               | This study          |
| pEXG2- $\Delta PA4133$                       | pEXG2 derivative carrying the PA4133 flanking regions                                                                                                                    | This study          |
| pUC18T-mini-Tn7T- <i>ParaBAD-1hcnABC</i> -Gm | pUC18 derivative carrying mini-Tn7T transposable cassette containing <i>araC</i> and the <i>araBAD</i> promoter immediately upstream of the 2995 bp <i>hcnABC</i> operon | This study          |
| pTNS2                                        | Helper plasmid for transposition of mini-Tn7T cassette                                                                                                                   | 4                   |

**Supplementary Table 2.** RT-PCR primers used in this study.

| Target gene | Primer name    | Sequence (5'-3')       | Amplicon (bp) | T <sub>m</sub> (°C) |
|-------------|----------------|------------------------|---------------|---------------------|
| <i>lasR</i> | <i>lasR</i> -F | cagaagatggcgagcgacctg  | 102           | 59.9                |
|             | <i>lasR</i> -R | cgggtagttgccgacgatgaag |               | 59.7                |
| <i>rhlR</i> | <i>rhlR</i> -F | gcgaccagcagaacatctccag | 122           | 59.6                |
|             | <i>rhlR</i> -R | cgggttgacatcagcatcgg   |               | 59.6                |
| <i>lasB</i> | <i>lasR</i> -F | cagaagatggcgagcgacctg  | 102           | 62                  |
|             | <i>lasR</i> -R | cgggtagttgccgacgatgaag |               | 61                  |
| PA4129      | PA4129-F       | gaggacaagaacgtcgagga   | 102           | 57                  |
|             | PA4129-R       | ctagcgtcggcggaacaa     |               | 58                  |
| PA4131      | PA4131-F       | tacatttcggcgcgacctt    | 125           | 59                  |
|             | PA4131-R       | caggtatagccgcaccagac   |               | 58                  |
| PA4133      | PA4133-F       | aactggttcttcggctcgtt   | 165           | 58                  |
|             | PA4133-R       | ggtcaggaagaagcctacgg   |               | 58                  |
| <i>cioA</i> | <i>cioA</i> -F | atcttcaaccgctcgttccc   | 143           | 58                  |
|             | <i>cioA</i> -R | catcgagagcatcttgcgga   |               | 58                  |
| <i>cioB</i> | <i>cioB</i> -F | ctggtgaccttctatgcgct   | 130           | 58                  |
|             | <i>cioB</i> -R | ggatgatgttcggccacagg   |               | 59                  |
| <i>rhdA</i> | <i>rhdA</i> -F | ctaccactatctcaacggcgg  | 176           | 58                  |
|             | <i>rhdA</i> -R | catccataaccgccaggtc    |               | 58                  |
| <i>proC</i> | <i>proC</i> -F | cgtcgtggctcctgctcggtca | 100           | 60                  |
|             | <i>proC</i> -R | ggcggcgatggagacgatca   |               | 60                  |

Supplementary Figure 1

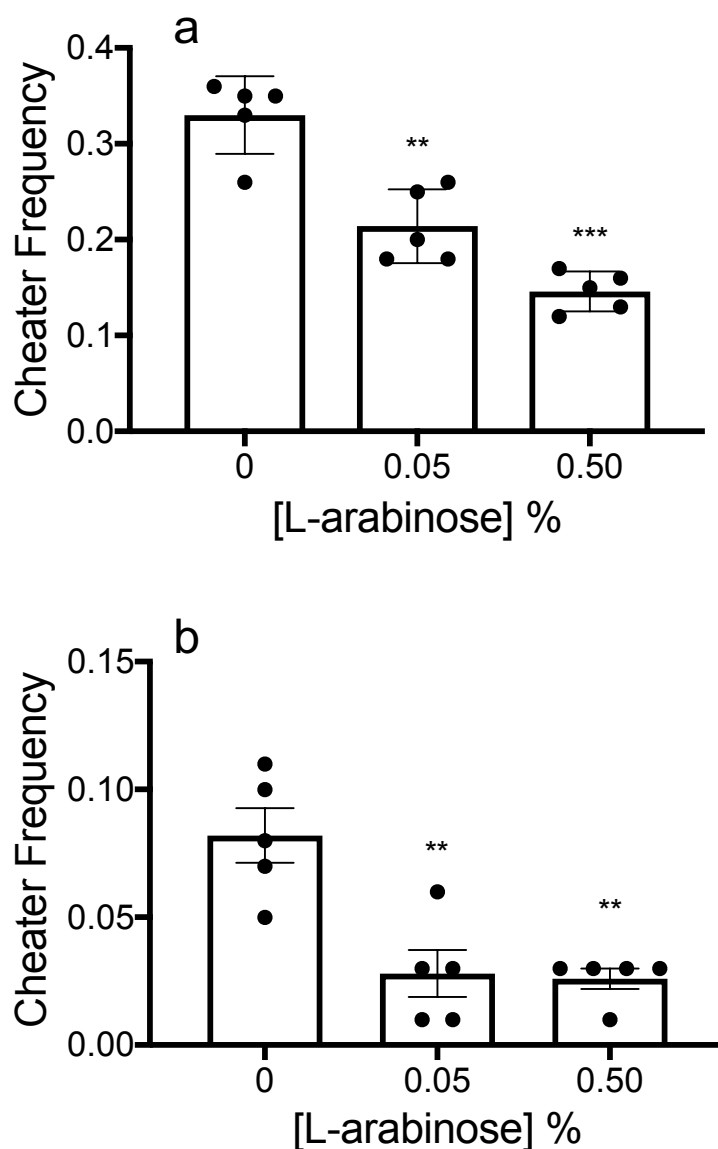

**Supplementary Figure 1. Endogenous production of HCN negatively affects LasR mutant enrichment in casein broth competitions with WT.** WT and LasR mutant strains harboring an L-arabinose-inducible copy of *hcnABC* were competed for 24 h in casein medium from a combined starting  $OD_{600}=0.05$  and target cheater frequency of 0.1 (a) or 0.01 (b). All other experimental conditions are the same as described for other competitions in Materials and Methods of the main text. Statistical significance determined by unpaired Student's *t*-test vs 0% L-arabinose alone ( $n=5$ ); \*\*\*,  $p < 0.001$ ; \*\*,  $p < 0.01$ . Means, s.e.m., and individual biological replicates are shown.

**Supplementary Figure 2**

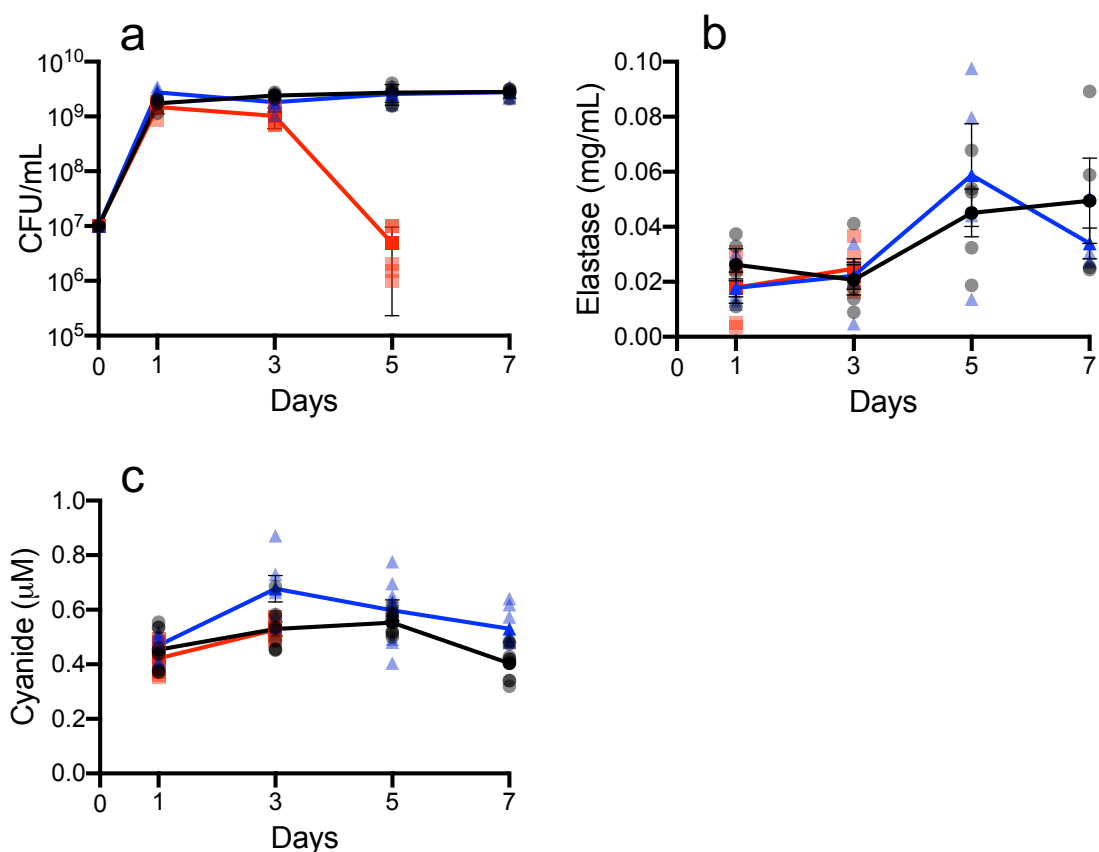

**Supplementary Figure 2. Co-culture productivity and QS-regulated cooperative behaviors.** In co-culture competitions between LasR mutant cheaters and WT cooperators (black circles), PA4133-null cooperators (blue triangles), or *cioA*-null cooperators (red squares), productivity was measured as CFU/mL (**a**) at each indicated timepoint. QS-regulated cooperative behaviors were also measured at these timepoints as elastase production (**b**) or cyanide concentration (**c**). See Materials and Methods for experimental procedures. A minimum of five biological replicates were performed and means, s.e.m., and individual replicates are shown.

### Supplementary Figure 3

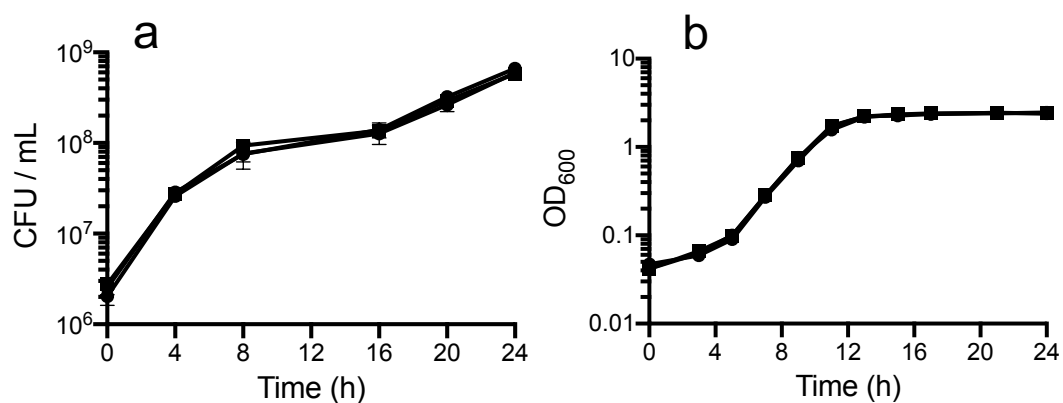

**Supplementary Figure 3. Growth rates of WT PAO1 (circle), a CioA-mutant (square), and a PA4133-mutant (triangle).** Bacteria were inoculated from overnight LB-MOPS cultures into casein broth (a) or LB-MOPS (b). Cell density in casein broth was measured by colony counts and in LB-MOPS by optical density at 600 nm. Means and s.e.m. are shown ( $n=5$ ).

## References

1. Stover, C. K. et al. Complete genome sequence of *Pseudomonas aeruginosa* PAO1, an opportunistic pathogen. *Nature* **406**, 959-964 (2000).
2. Wang, M. et al. Quorum sensing and policing of *Pseudomonas aeruginosa* social cheaters. *Proc. Natl. Acad. Sci. U.S.A.* **112**, 2187-2191 (2015).
3. Rietsch, A. et al. ExsE, a secreted regulator of type III secretion genes in *Pseudomonas aeruginosa*. *Proc. Natl. Acad. Sci. U.S.A.* **102**, 8006-8011(2005).
4. Choi, K. H. et al. mini-Tn7 insertion in bacteria with secondary, non-*glmS*-linked attTn7 sites: example *Proteus mirabilis* HI4320. *Nat. Protoc.* **1**, 170-178 (2006).
